# Supplementary material
Source: MDPI journal article supplement (https://www.mdpi.com/2673-8929/2/4/25)
Supplement: s1 [file s1]

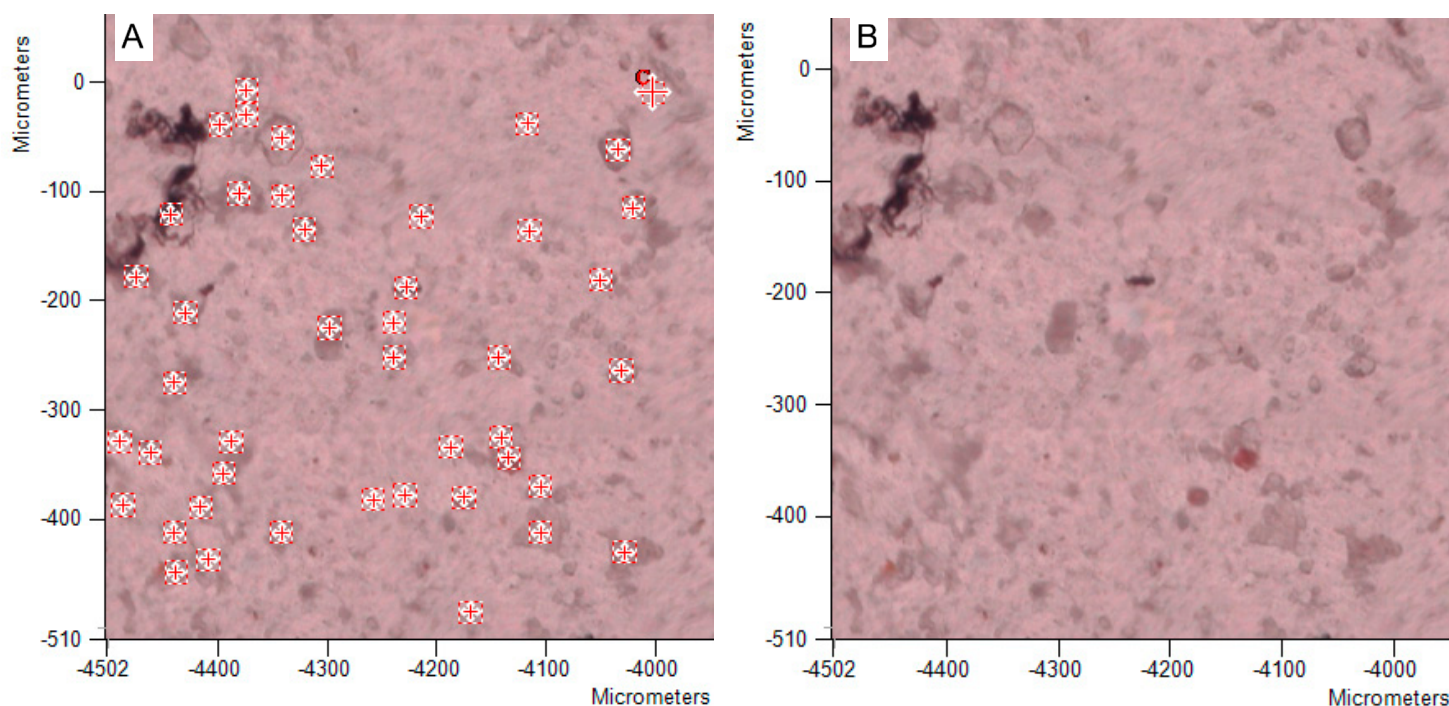

Figure S1. Principle of single spot particle analysis in the PerkinElmer FT-IR Microscopy System. **A:** Operator view of the 500 μm × 500 μm microscope image with marked particles. Each red and white dashed square (20 μm × 20 μm) equals one marked particle. All unmarked particles did not fit the criteria or were out of bound. **B:** same view as 'A' without the markings.

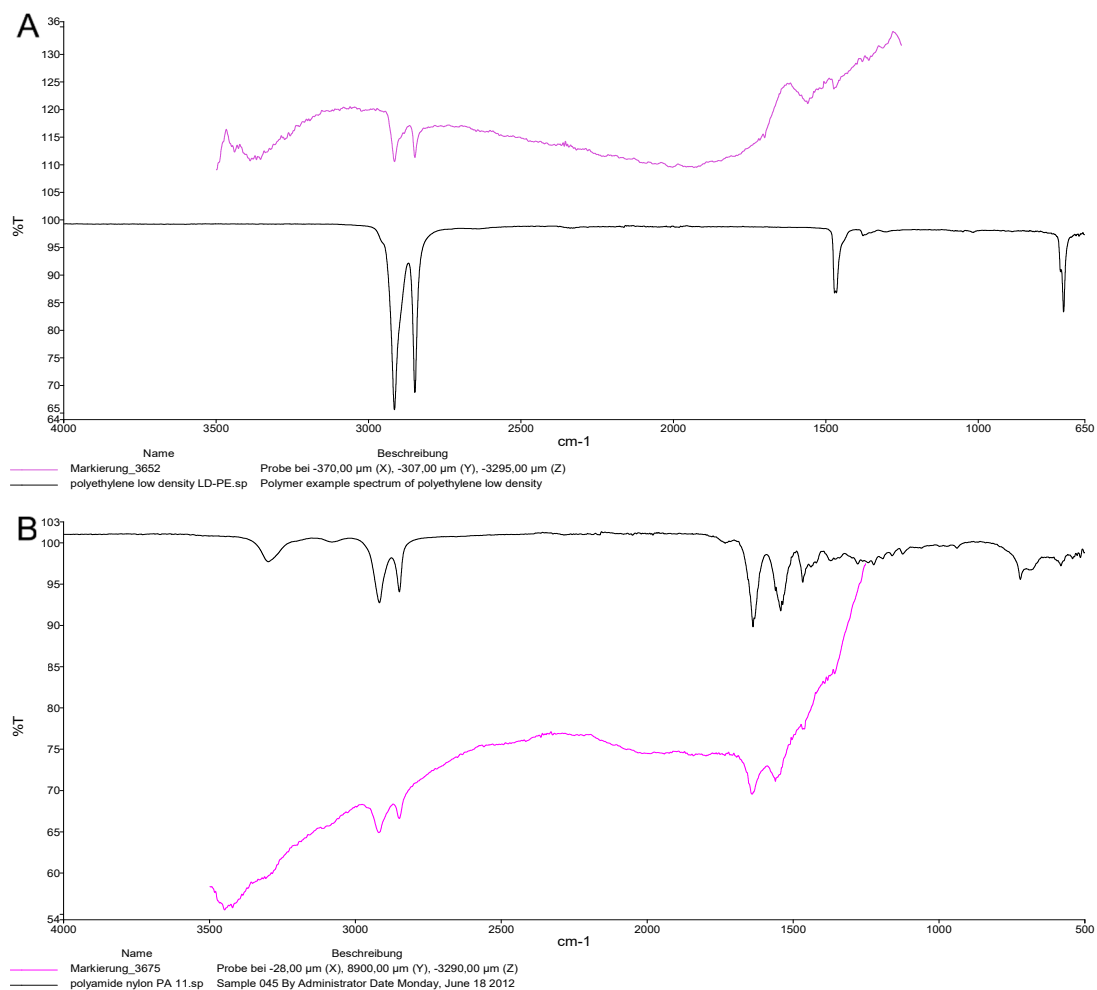

Figure S2. **A:** Example spectra of Polyethylene (PE) with a correlation coefficient of 0.79. **B:** Example spectra of Polyamide (PA) with a correlation coefficient of 0.70. A Correlation of 70 % was chosen to be the smallest correlation counted as positive.

# Polymer composition data

Table S1. Polymer composition calculated by summation of particle numbers of samples of each sampling method.

| Polymer                                | Depth sample<br>0 m |     | Depth sample<br>3 m |     | Depth sample<br>6 m |     | Cartridge<br>filters |     | Net filters<br>(65 µm) |     | Net filters<br>(105 µm) |     | %   |
|----------------------------------------|---------------------|-----|---------------------|-----|---------------------|-----|----------------------|-----|------------------------|-----|-------------------------|-----|-----|
|                                        | p·L <sup>-1</sup>   | %   | p·L <sup>-1</sup>   | %   | p·L <sup>-1</sup>   | %   | p·L <sup>-1</sup>    | %   | p·L <sup>-1</sup>      | %   | p·L <sup>-1</sup>       | %   |     |
| Polyethylene terephthalate (PET)       | 20122.8             | 63% | 18691.0             | 30% | 31953.8             | 55% | 1378.0               | 64% | 28.4                   | 31% | 17.0                    | 37% | 46% |
| Polytetrafluorethylene (PTFE)          | 7488.8              | 23% | 11253.7             | 18% | 18739.4             | 32% | 574.6                | 27% | 10.3                   | 11% | 2.7                     | 6%  | 25% |
| Polyethylene (PE)                      | 2043.1              | 6%  | 14058.1             | 22% | 513.3               | <1% |                      | 0%  | 7.2                    | 8%  | 4.6                     | 10% | 11% |
| Polyamid (PA)                          | 911.3               | 3%  | 6830.9              | 11% | 623.8               | 1%  | 24.1                 | 1%  | 6.5                    | 7%  | 5.4                     | 12% | 5%  |
| Ethylenevinyl acetate (EVA)            | 322.3               | 1%  | 6454.9              | 10% | 91.0                | <1% |                      | 0%  | 9.3                    | 10% | 0.2                     | <1% | 4%  |
| Polycarbonate (PC)                     | 595.4               | 2%  |                     | 0%  | 4304.5              | 7%  | 20.6                 | <1% |                        | 0%  |                         | 0%  | 3%  |
| Ethylene Vinylalcohol Copolymer (EVOH) | 44.3                | <1% | 3842.0              | 6%  | 616.9               | 1%  | 50.7                 | 2%  | 27.0                   | 29% | 14.3                    | 31% | 3%  |
| Polysulfone (PSU)                      |                     | 0%  | 1585.0              | 3%  | 1287.0              | 2%  | 2.6                  | <1% |                        | 0%  | 0.4                     | <1% | 2%  |
| Polypropylene (PP)                     | 335.8               | 1%  |                     | 0%  |                     | 0%  | 23.7                 | 1%  | 0.4                    | <1% |                         | 0%  | 0%  |
| Polybutylene terephthalate (PBT)       |                     | 0%  | 166.7               | <1% |                     | 0%  |                      | 0%  | 3.9                    | 4%  | 1.5                     | 3%  | 0%  |
| Polypropylene terephthalate (PPT)      | 83.0                | <1% |                     | 0%  |                     | 0%  | 37.0                 | 2%  | 0.1                    | <1% |                         | 0%  | 0%  |
| Polyether sulfone (PES)                | 83.0                | <1% |                     | 0%  |                     | 0%  |                      | 0%  |                        | 0%  |                         | 0%  | 0%  |
| Polyvinyl chloride (PVC)               |                     | 0%  |                     | 0%  |                     | 0%  | 24.6                 | 1%  |                        | 0%  | 0.2                     | <1% | 0%  |
| Polystyrene (PS)                       |                     | 0%  |                     | 0%  |                     | 0%  | 6.1                  | <1% |                        | 0%  |                         | 0%  | 0%  |
| Polyurethane (PU)                      |                     | 0%  |                     | 0%  |                     | 0%  |                      | 0%  | 2.1                    | 2%  |                         | 0%  | 0%  |

# Particle amount data

Table S2. Particle numbers of each sample of the sampling methods.

| Sampling method               | Net filters<br>105µm /p·L <sup>-1</sup> | Net filters<br>65µm /p·L <sup>-1</sup> | Cartridge filters<br>/p·L <sup>-1</sup> | Depth samples<br>0m / p·L <sup>-1</sup> | All depth samples<br>p·L <sup>-1</sup> |
|-------------------------------|-----------------------------------------|----------------------------------------|-----------------------------------------|-----------------------------------------|----------------------------------------|
| Particle number of<br>samples | 31.8                                    | 78.5                                   | 2817.8                                  | 44561.5                                 | 44561.5                                |
|                               | 79.1                                    | 151.8                                  | 2989.0                                  | 22012.1                                 | 22012.1                                |
|                               | 27.7                                    | 55.4                                   | 2589.1                                  | 28544.8                                 | 28544.8                                |
|                               |                                         |                                        | 2313.3                                  |                                         | 41253.4                                |
|                               |                                         |                                        |                                         |                                         | 76467.0                                |
|                               |                                         |                                        |                                         |                                         | 70926.2                                |
|                               |                                         |                                        |                                         |                                         | 3437.3                                 |
|                               |                                         |                                        |                                         |                                         | 8850.8                                 |
| Average                       | 46.2                                    | 95.2                                   | 2677.3                                  | 31706.1                                 | 37006.6                                |
| Variance                      | 816.2                                   | 2532.4                                 | 85717.7                                 | 134614486.2                             | 714122831.7                            |
| Standard deviation            | 28.6                                    | 50.3                                   | 292.8                                   | 11602.3                                 | 26723.1                                |
| Coefficient of<br>variation   | 62%                                     | 53%                                    | 11%                                     | 37%                                     | 72%                                    |
